# Supplementary material
Source: Research Square preprint supplement (doi:10.21203/rs.3.rs-8846183/v1)
Supplement: Supplementary file 1 [file 9ed031068cb671688550f60a.docx]

**Reconstructing seasonally focused shellfish harvesting strategies of First Nations communities on the northern Great Barrier Reef (Australia) during the Late Holocene**

**Journal name:** [**Journal of Archaeological Research**](https://link.springer.com/journal/10814)

Mahsa Alidoostsalimi1,2, Amy L. Prendergast1,2*, Sean Ulm3, Russell N. Drysdale1, Josephine Brown1, Ian J. McNiven4, Ariana B.J. Lambrides3,5, Michael C. Kneppers3,5, Sarah J. Collins3, Robert M. Klaebe6, Nguurruumungu Indigenous Corporation7, and Walmbaar Aboriginal Corporation RNTBC8

1 School of Geography, Earth and Atmospheric Sciences, University of Melbourne, Victoria, Australia

2ARC Centre of Excellence for Indigenous and Environmental Histories and Futures, University of Melbourne, Victoria, Australia

3ARC Centre of Excellence for Indigenous and Environmental Histories and Futures, James Cook University, Cairns, Queensland, Australia

4ARC Centre of Excellence for Australian Biodiversity and Heritage, Monash Indigenous Studies Centre, Monash University, Clayton, Victoria, Australia

5College of Arts, Society and Education, James Cook University, Cairns, Queensland, Australia

6Department of Earth Sciences, School of Physics, Chemistry and Earth Sciences, University of Adelaide, South Australia, Australia

7 PO Box 886, Cooktown, Queensland, Australia

824 Flierl Street, Hope Vale, Queensland, Australia

*****Corresponding Authors:

Amy Prendergast: amy.prendergast@unimelb.edu.au

Postal address: 221 Bouverie St, Carlton, Melbourne, Victoria 3053, Australia.

**Supplementary Information (SI)**


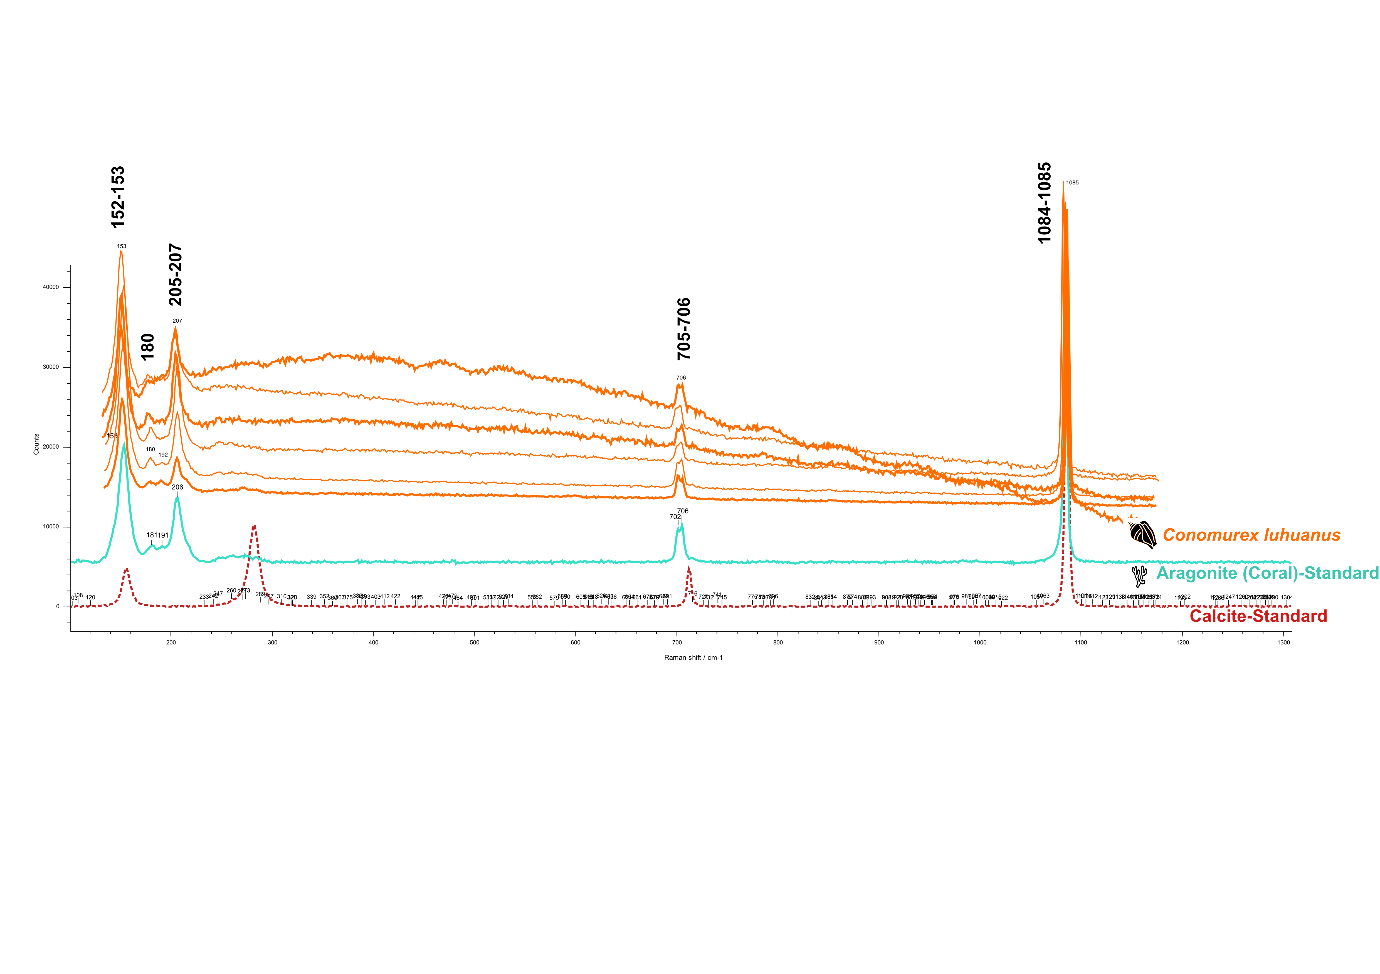


Fig. S1
