# Supplementary material
Source: Research Square preprint supplement (doi:10.21203/rs.3.rs-8846183/v1)
Supplement: Supplementary file 1 [file 735943d5b22b25db56b90074.xlsx]

## Sheet: Information
Reconstructing seasonally focused shellfish harvesting strategies of First Nations communities on the northern Great Barrier Reef (Australia) during the Late Holocene
Submitted for the Journal of Archaeological Research
Mahsa Alidoostsalimi1,2, Amy L. Prendergast1,2*, Sean Ulm3, Russell N. Drysdale1, Josephine Brown1, Ian J. McNiven4, Ariana B. J. Lambrides3,5, Michael C. Kneppers3,5, Sarah Collins3, Robert M. Klaebe6, Nguurruumungu Indigenous Corporation7, and Walmbaar Aboriginal Corporation RNTBC8
1 School of Geography, Earth and Atmospheric Sciences, University of Melbourne, Victoria, Australia
2ARC Centre of Excellence for Indigenous and Environmental Histories and Futures, University of Melbourne, Victoria, Australia
3ARC Centre of Excellence for Indigenous and Environmental Histories and Futures, James Cook University, Cairns, Queensland, Australia
4ARC Centre of Excellence for Australian Biodiversity and Heritage, Monash Indigenous Studies Centre, Monash University, Clayton, Victoria, Australia
5College of Arts, Society and Education, James Cook University, Cairns, Queensland, Australia
6Department of Earth Sciences, School of Physics, Chemistry and Earth Sciences, University of Adelaide, South Australia, Australia
7 PO Box 886, Cooktown, Queensland, Australia
824 Flierl Street, Hope Vale, Queensland, Australia
*Corresponding Authors:
Amy Prendergast: amy.prendergast@unimelb.edu.au
Postal address: 221 Bouverie St, Carlton, Melbourne, Victoria 3053, Australia.
The Oxygen Isotope data obtained from archaeologcial samples (raw data), XU10 and XU36

## Sheet: XU-10-Oxygen Isotope data 
Source file	O_Delta_final
XU10_3_1-2	-1.05
XU10_3_3-4	-1.01
XU10_3_5-9	-1.13
XU10_3_10-11	-1.03
XU10_3_12-13	-1.23
XU10-3-15	-0.656
XU10-3-16	-1.04
XU10_3_17	-1.24
XU10-3-18	-1.087
XU10-3-19	-1.083
XU10-3-120	-1.211
XU10-3-21	-1.454
XU10-3-22	-1.609
XU10_3_23	-1.56
XU10_3_24-25	-1.57
XU10-3-26	-1.598
XU10-3-27	-1.608
XU10-3-28	-1.68
XU10-3-29	-1.735
XU10-3-30	-1.842
XU10-3-31	-1.889
XU10-3-32	-1.888
XU10-3-33	-1.934
XU10-3-34	-1.704
XU10_3_35	-1.89
XU10-3-36	-1.622
XU10_3_37	-1.79
XU10-3-39	-1.467
XU10-3-40	-1.455
XU10-3-41	-1.425
XU10-3-42	-1.43
XU10-3-43	-1.574
XU10-3-44	-1.775
XU10-3-45	-1.854
XU10-3-46	-1.896
XU10_3_47	-1.82
XU10_3_48	-2.05
XU10-3-50	-1.543
XU10-3-51	-1.768
XU10-3-52	-1.66
XU10-3-53	-1.579
XU10-3-54	-1.546
XU10_3_55	-1.86
XU10-3-56	-1.589
XU10-3-57	-1.357
XU10-3-58	-1.505
XU10-3-61	-1.82
XU10-4-1-2-	-0.56
XU10-4-3	-0.73
XU10-4-4-5	-0.94
XU10-4-6	-0.591
XU10-4-7
XU10-4-8	-0.739
XU10-4-9
XU10-4-10	-0.75
XU10-4-11
XU10-4-12	-0.776
XU10-4-13	-0.839
XU10-4-14	-0.84
XU10-4-15	-0.781
XU10-4-16
XU10-4-17	-0.812
XU10-4-18	-0.676
XU10-4-19
XU10-4-20	-0.741
XU10-4-21	-0.859
XU10-4-22
XU10-4-23	-0.97
XU10-4-24	-0.998
XU10-4-25
XU10-4-26	-1.059
XU10-4-27
XU10-4-28	-0.972
XU10-4-29
XU10-4-30	-0.891
XU10-4-31	-1.089
XU10-4-32	-0.895
XU10-4-33	-1.12
XU10-4-34
XU10-4-35	-0.969
XU10-4-36	-0.915
XU10-4-37
XU10-4-38
XU10-4-39
XU10-4-40	-1.144
XU10-4-41
XU10-4-42	-1.021
XU10-4-43
XU10-4-44	-0.692
XU10-4-45	-0.996
XU10-4-46
XU10-4-47	-0.912
XU10-4-48	-0.985
XU10-4-49	-0.902
XU10-4-50	-0.97
XU10-4-51	-1.03
XU10-4-52	-0.945
XU10-4-53	-1.17
XU10-4-54
XU10-4-55	-1.26
XU10-4-56
XU10-4-57
XU10-4-58	-1.071
XU10-4-59	-1.133
XU10-4-60	-1.052
XU10-4-61	-0.839
XU10-4-62	-1.018
XU10-4-63	-0.762
XU10-4-64
XU10-4-65	-0.861
XU10-4-66	-1.038
XU10-4-67
XU10-4-68	-1.129
XU10-4-69	-1.026
XU10-4-70	-0.901
XU10-4-71
XU10-4-72	-0.95
XU10-4-73	-0.836
XU10-4-74	-1.035
XU10-4-75	-1.246
XU10-4-76	-1.359
XU10-4-77	-1.066
XU10-4-78	-1.026
XU10-4-79	-1.258
XU10-4-80	-0.946
XU10-4-81	-0.836
XU10-4-82	-0.975
XU10-4-83	-0.972
XU10-4-84	-1.092
XU10-4-85	-1.18
XU10-4-86	-1.152
XU10-4-87	-1.001
XU10-4-88
XU10-4-89	-0.69
XU10-4-90	-1.17
XU10-4-91
XU10-4-92
XU10-4-93	-1.25
XU10-4-94	-1.161
XU10-4-95	-1.202
XU10-4-96	-1.186
XU10-4-97	-1.245
XU10-4-98	-1.078
XU10-4-99	-1.385
XU10-4-100	-1.33
XU10-4-101	-1.409
XU10-4-102	-1.556
Con-10-5-1	-0.755
Con-10-5-2	-1.005
Con-10-5-3	-0.909
Con-10-5-4	-1.084
Con-10-5-5	-0.993
Con-10-5-6	-1.124
Con-10-5-7	-0.775
Con-10-5-8	-0.816
Con-10-5-9	-1.337
Con-10-5-10	-1.116
Con-10-5-11	-1.246
Con-10-5-12	-1.135
Con-10-5-13
Con-10-5-14
Con-10-5-15
Con-10-5-16
Con-10-5-17
Con-10-5-18
Con-10-5-19
XU10-5-20	-0.87
XU10-5-22	-0.862
XU10-5-23	-0.972
XU10-5-25	-0.99
XU10-5-27	-0.548
XU10-5-28	-0.626
XU10-5-30	-0.923
XU10-5-32	-0.57
XU10-5-33	-0.514
XU10-5-34	-0.615
XU10-5-35	-0.387
XU10-5-38	-0.9
XU10-5-39	-0.942
XU10-5-40	-0.919
XU10-5-41	-1.056
XU10-5-42	-0.851
XU10-5-43	-0.959
XU10-5-44	-0.998
XU10-5-45	-1.292
XU10-5-46	-1.128
XU10-5-47	-1.009
XU10-5-48	-1.018
XU10-5-49	-1.016
XU10-5-50	-0.942
XU10-5-51	-1.276
XU10-5-52	-1.12
XU10-5-53	-1.181
XU10-5-54	-1.208
XU10-5-55	-1.391
XU10_7_2	-1.55
XU10_7_3-4	-1.39
XU10_7_5	-1.34
XU10_7_6-8	-1.26
XU10_7_8-9	-1.51
XU10_7_10-11	-1.49
XU10-7-12	-1.3671
XU10-7-13	-1.332
XU10-7-14
XU10-7-15	-1.107
XU10-7-16
XU10_7_17	-1.49
XU10-7-18	-1.274
XU10-7-19
XU10-7-20	-1.364
XU10-7-21	-1.187
XU10-7-22	-1.466
XU10-7-23	-1.004
XU10-7-24	-1.183
XU10-7-25	-1.083
XU10-7-26	-1.093
XU10-7-27	-1.075
XU10-7-28	-1.04
XU10-7-29	-0.99
XU10-7-30	-1.087
XU10-7-31	-1.056
XU10-7-32	-0.828
XU10-7-33	-1.303
XU10-7-34	-0.8
XU10-7-35	-0.869
XU10-7-36
XU10-7-37	-0.889
XU10-7-38	-1.06
XU10-7-39	-1.261
XU10-7-40	-1.073
XU10-7-41	-0.974
XU10-7-42	-0.95
XU10-7-43	-1.041
XU10-7-44	-1.01
XU10-7-45	-1.06
XU10-7-46	-1.027
XU10-7-47	-1.085
XU10-7-48	-0.966
XU10-7-49	-0.813
XU10-7-50	-0.728
XU10-7-51
XU10-7-52	-0.81
XU10-7-53	-0.92
XU10-7-54	-1.12
XU10-7-55	-0.829
XU10-7-56
XU10-7-57	-0.761
XU10-7-58	-0.919
XU10-7-59	-0.81
XU10-7-60	-0.687
XU10-7-61	-0.73
XU10-7-62	-0.906
XU10-12-1	-1.26
XU10-12-4	-0.71
XU10-12-5	-0.72
XU10-12-7	-0.63
XU10-12-8	-0.49
XU10-12-9	-0.68
XU10-12-10	-0.49
XU10-12-13	-0.484
XU10-12-15	-0.732
XU10-12-17	-0.67
XU10-12-18	-0.858
XU10-12-20	-0.864
XU10-12-21	-0.755
XU10-12-22	-0.787
XU10-12-23	-0.63
XU10-12-25	-0.736
XU10-12-26	-0.73
XU10-12-27	-0.791
XU10-12-28	-0.696
XU10-12-29	-0.766
XU10-12-30	-0.663
XU10-12-33	-0.726
XU10-12-34	-0.736
XU10-12-35	-0.844
XU10-12-37	-0.62
XU10-12-38	-0.494
XU10-12-40	-0.574
XU10-12-41	-0.354
XU10-12-42	-0.552
XU10-12-43	-0.448
XU10-12-45	-0.559
XU10-12-46	-0.61
XU10-12-48	-0.629
XU10-12-49	-0.594
XU10-12-50	-0.517
XU10-12-52	-0.985
XU10-12-53	-0.821
XU10-12-54	-1.013
XU10-12-55	-1.33
XU10-12-56	-1.091
XU10-12-57	-1.164
XU10-12-58	-0.992
XU10-12-59	-1.027
XU10-12-61	-1.18
XU10-12-63	-0.921
XU10-12-64	-1.044
XU10-12-65	-1.12
XU10-12-66	-1.31
XU10-12-67	-1
XU10-12-69	-1.035
XU10-12-70	-1.078
Con-10-13-1	-0.915
Con-10-13-2	-0.997
Con-10-13-3	-0.989
Con-10-13-4	-1.08
Con-10-13-5	-0.961
Con-10-13-6	-0.795
Con-10-13-7	-1.045
Con-10-13-8	-0.949
Con-10-13-9	-1.028
Con-10-13-10	-0.946
Con-10-13-11	-1.019
Con-10-13-12	-1.089
Con-10-13-13	-0.956
Con-10-13-14	-0.933
Con-10-13-15	-0.711
Con-10-13-16	-1.139
Con-10-13-17	-1.104
Con-10-13-18	-1.262
Con-10-13-19	-1.067
Con-10-13-20	-1.188
Con-10-13-21	-1.128
Con-10-13-22	-1.297
Con-10-13-24	-1.415
Con-10-13-25	-1.333
Con-10-13-26	-1.497
Con-10-13-27	-1.504
XU10-13-18	-1.011
XU10-13-19	-0.85
XU10-13-20	-0.961
XU10-13-21	-0.754
XU10-13-22	-1.096
XU10-13-23	-0.933
XU10-13-24	-1.184
XU10-13-25	-0.922
XU10-13-26	-1.225
XU10-13-27	-1.189
XU10-13-28	-1.261
XU10-13-29	-1.152
XU10-13-30	-1.586
XU10-13-31	-1.477
XU10-13-32	-1.377
XU10-13-33	-1.37
XU10-13-34	-1.349
XU10-13-35	-1.086
XU10-13-36	-0.976
XU10-13-37	-1.45
XU10-13-38	-1.315
XU10-13-39	-1.292
XU10-13-40	-0.893
XU10-13-41	-1.222
XU10-13-42	-1.273
XU10-13-43	-1.224
XU10-13-44	-1.201
XU10-13-45	-1.261
XU10-13-46	-1.38
XU10-13-47	-1.47
XU10-13-48	-1.35
XU10-13-49	-1.59
XU10-13-50	-1.609
XU10-13-51	-1.3
XU10-13-52	-1.404
XU10-13-53	-1.324
XU10-13-54	-1.561
XU10-13-55	-1.56
XU10-13-56	-1.567
XU10-13-57	-1.629
XU10-13-58	-1.71
XU10-13-59	-1.669
XU10-13-60	-1.627
XU10-13-61	-1.83
XU10-13-62	-1.713
XU10-13-63	-1.806
XU10-13-64	-1.867
XU10-13-65	-1.5
XU10-13-66	-1.55
XU10-13_67	-1.697
XU10-13-68	-1.613
XU10-13-69	-1.843
XU10-14-S-1	-0.52
XU10-14-S-2	-1.08
XU10-14-S-3	-1.29
XU10-14-S-4	-1.1
XU10-14-S-5	-1.49
XU10-14-S-6	-1.4
XU10-14-S-7	-0.505
XU10-14-S-8	-0.276
XU10-14-S-9	-0.683
XU10-14-S-10	-0.635
XU10-14-S-11	-0.72
XU10-14-S-12	-0.589
XU10-14-S-13	-0.785
XU10-14-S-14	-0.546
XU10-14-S-15	-0.716
XU10-14-S-16	-0.579
XU10-14-S-17	-0.544
XU10-14-S-18	-0.585
XU10-14-S-19	-0.236
XU10-14-S-20	-0.5
XU10-14-S-21	-0.471
XU10-14-S-22	-0.6449
XU10-14-S-23	-0.687
XU10-14-S-24	-0.698
XU10-14-S-25	-0.748
XU10-14-S-26	-0.8
XU10-14-S-27	-0.863
XU10-14-S-28	-0.743
XU10-14-S-29	-0.795
XU10-14-S-30	-0.987
XU10-14-S-31	-0.882
XU10-14-S-32	-0.907
XU10-14-S-33	-0.773
XU10-14-S-34	-0.826
XU10-14-S-35	-0.87
XU10-14-S-36	-0.821
XU10-14-S-37	-0.876
XU10-14-S-38	-0.79
XU10-14-S-39	-0.711
XU10-14-S-40	-0.67
XU10-14-S-41	-0.951
XU10-14-S-42	-0.854
XU10-14-S-43	-0.821
XU10-14-S-44	-0.932
XU10-14-S-45	-1.151
XU10-14-S-46	-1.033
XU10-14-S-47	-1.141
XU10-14-S-48	-0.903
XU10-14-S-49	-1.073
XU10-14-S-50	-1.11
XU10-14-S-51	-0.88
XU10-14-S-52	-1.037
XU10-14-S-53	-1.12
XU10-14-S-54	-1.034
XU10-14-S-55	-0.777
XU10-14-S-56	-0.908
XU10_15_1-4	-1.36
XU10_15_5	-1.22
XU10_15_6	-1.16
XU10-15-8	-0.919
XU10-15-9	-0.894
XU10-15-10	-0.74
XU10-15-11	-0.773
XU10-15-12	-0.888
XU10-15-13	-0.502
XU10-15-14	-0.506
XU10-15-15	-0.619
XU10-15-16	-0.569
XU10-15-17
XU10-15-18	-0.467
XU10-15-19	-0.557
XU10-15-20	-0.176
XU10-15-21	-0.359
XU10-15-22	-0.417
XU10-15-23	-0.34
XU10-15-24	-0.24
XU10-15-25	-0.142
XU10-15-26	-0.3
XU10-15-27	-0.207
XU10-15-28a	-0.358
XU10-15-28b	-0.071
XU10-15-29	-0.373
XU10-15-30	-0.37
XU10-15-31	-0.41
XU10-15-32	-0.349
XU10-15-33
XU10-15-34
XU10-15-34	-0.493
XU10-15-35	-0.44
XU10-15-36	-0.651
XU10_15_37	-0.61
XU10-15-38	-0.64
XU10-15-39	-0.651
XU10-15-40	-0.263
XU10-15-41	-0.397
XU10-15-42	-0.3834
XU10-15-43	-0.615
XU10-15-44	-0.614
XU10-15-45	-0.639
XU10-15-46	-0.641
XU10-15-47	-0.536
XU10-15-48	-0.365
XU10-15-49	-0.497
XU10-15-50	-0.4
XU10-15-51	-0.192
XU10-15-52	-0.658
XU10-15-53	-0.631
XU10-15-54	-0.489
XU10-15-55	-0.634
XU10-15-56	-0.703
XU10-15-57	-0.058
XU10-15-58	-0.667
XU10-15-59	-0.532
XU10-15-60	-0.574
XU10-15-61	-0.56
XU10-15-62	-0.512

## Sheet: XU-36-Oxygen Isotope data 
Source file	O_Delta_final
XU36-2-1-4	-1.25
XU36-2-5-8	-1.08
xu36-2-9-11	-0.91
xu36-2-12-14	-1.2
xu36-2-17	-1.27
XU36-2-15	-1.116
XU36-2-16	-1.04
XU36-2-17
XU36-2-18	-1.083
XU36-2-19	-1.02
xu36-2-20	-1.18
XU36-2-21	-1.059
XU36-2-22	-0.989
XU36-2-23	-1.13
XU36-2-24	-1.04
XU36-2-25	-0.981
XU36-2-26	-0.986
XU36-2-27	-0.785
XU36-2-28	-1.141
XU36-2-29	-1.181
XU36-2-30	-0.892
XU36-2-31	-0.928
XU36-2-32	-1.075
XU36-2-33	-1.112
XU36-2-34	-0.997
xu36-2-35	-1.51
Con-36-3-2	-1.487
Con-36-3-3	-2.238
Con-36-3-4	-1.591
Con-36-3-5	-1.607
Con-36-3-6	-1.512
Con-36-3-7	-1.078
Con-36-3-8	-1.299
Con-36-3-9	-1.877
Con-36-3-10	-1.919
Con-36-3-11	-2.057
Con-36-3-12	-1.854
Con-36-3-13	-2.033
Con-36-3-14	-2.053
Con-36-3-15	-1.965
Con-36-3-16	-1.866
Con-36-3-17	-2.106
Con-36-3-18	-2.218
Con-36-3-19	-2.133
Con-36-3-20	-2.069
Con-36-3-21	-2.126
XU36-3-32	-1.656
XU36-3-33	-1.769
XU36-3-34	-1.852
XU36-3-35	-1.841
XU36-3-36	-1.642
XU36-3-37	-1.726
XU36-3-38	-1.595
XU36-3-39	-1.592
XU36-3-40	-1.37
XU36-3-41	-1.68
XU36-3-42	-1.556
XU36-3-43	-1.452
XU36-3-44	-1.349
XU36-3-45	-1.19
XU36-3-46	-1.297
XU36-3-47	-1.255
XU36-3-48	-1.069
XU36-3-49	-0.908
XU36-3-50	-0.886
XU36-3-51	-1.22
XU36-3-52	-1.092
XU36-3-53	-1.108
XU36-3-54	-1.096
XU36-3-55	-1.092
XU36-3-56	-0.999
XU36-3-57	-0.862
XU36-3-58	-0.709
XU36-3-I-60	-0.885
XU36-3-I-61	-0.868
XU36-3-I-62	-0.745
XU36-3-I-63	-0.661
XU36-3-I-64	-0.949
XU36-3-I-65	-1.112
XU36-3-I-66	-0.976
XU36-3-I-67	-1.133
XU36-3-I-68	-1.22
XU36-4-I-1	-1.158
XU36-4-I-2	-1.488
XU36-4-I-3	-1.705
XU36-4-I-4	-1.614
XU36-4-I-5	-1.704
XU36-4-I-6	-1.826
XU36-4-I-7	-1.52
XU36-4-I-8	-1.386
XU36-4-I-9	-1.55
XU36-4-I-10	-1.158
XU36-4-I-11	-1.841
XU36-4-I-12	-1.761
XU36-4-I-13	-1.386
XU36-4-I-14	-1.109
XU36-4-I-15	-1.409
XU36-4-I-16	-1.629
XU36-4-I-17	-1.769
XU36-4-I-18	-1.791
XU36-4-I-19	-1.765
XU36-4-I-20	-1.634
XU36-4-I-21	-1.573
XU36-4-I-22	-1.453
XU36-4-I-23	-1.465
XU36-4-I-24
XU36-4-I-25	-1.454
XU36-4-I-26	-1.371
XU36-4-I-27	-1.366
XU36-4-I-28	-1.167
XU36-4-I-29	-1.226
XU36-4-I-30
XU36-4-I-31	-1.224
XU36-4-I-32
XU36-4-I-33	-1.241
XU36-4-I-34	-1.116
XU36-4-I-35	-1.265
XU36-4-I-36	-1.344
XU36-4-I-37	-1.347
XU36-4-I-38	-1.262
XU36-4-I-39
XU36-4-I-40	-0.964
XU36-4-I-41	-1.125
XU36-4-I-42
XU36-4-I-43	-1.062
XU36-4-I-44
XU36-4-I-45
XU36-4-I-46	-0.999
XU36-4-I-47
XU36-4-I-48	-1.037
XU36-4-I-49	-0.887
Con-36-5-1	-1.334
Con-36-5-2	-1.587
Con-36-5-3	-1.659
Con-36-5-4	-1.726
Con-36-5-5	-1.421
Con-36-5-6	-1.849
Con-36-5-7	-1.811
XU36-5-10	-1.381
XU36-5-11	-1.47
XU36-5-12
XU36-5-13	-1.43
XU36-5-14	-1.582
XU36-5-15	-1.476
XU36-5-16	-1.51
XU36-5-17
XU36-5-18	-1.712
XU36-5-19	-1.228
XU36-5-20	-1.291
XU36-5-21	-1.606
XU36-5-22	-1.512
XU36-5-23	-1.396
XU36-5-25	-1.215
XU36-5-26	-1.137
XU36-5-27	-1.558
XU36-5-28	-1.602
XU36-5-29	-1.57
XU36-5-30	-1.543
XU36-5-31	-1.49
XU36-5-32	-1.457
XU36-5-33	-1.408
XU36-5-34	-1.643
XU36-5-35	-1.729
XU36-5-36	-1.34
XU36-5-37	-1.408
XU36-5-38	-1.49
XU36-5-39	-1.602
XU36-5-40	-1.448
XU36-5-41
XU36-5-42	-1.192
XU36-5-43	-1.2978
Con-36-6-1	-0.965
Con-36-6-2	-0.802
Con-36-6-3	-0.736
Con-36-6-4	-0.949
Con-36-6-5	-1.064
Con-36-6-6	-1.202
Con-36-6-7	-1.355
Con-36-6-8	-1.373
Con-36-6-9	-1.3
Con-36-6-10	-1.25
Con-36-6-1-11	-1.145
XU36-6-24	-1.091
XU36-6-25	-1
XU36-6-26	-1.038
XU36-6-27	-1.275
XU36-6-28	-0.96
XU36-6-29	-0.905
XU36-6-30	-0.772
XU36-6-31	-0.814
XU36-6-32	-0.904
XU36-6-33	-0.96
XU36-6-34	-0.791
XU36-6-35	-0.95
XU36-6-36	-0.88
XU36-6-37	-0.871
XU36-6-38	-0.767
XU36-6-39	-0.802
XU36-6-40	-0.681
XU36-6-41	-0.764
XU36-6-42	-0.478
XU36-6-43	-0.699
XU36-6-44	-0.603
XU36-6-45	-0.626
XU36-7-1	-0.67
XU36-7-2-3	-0.55
XU36-7-4-5	-0.71
XU36-7-7-10	-1.39
XU36-7-14	-1.95
XU36-7-20	-1.49
XU36-7-21	-1.42
XU36-7-22-23	-1.122
XU36-7-26	-1.41
XU36-7-24	-1.508
XU36-7-25	-1.467
XU36-7-27	-1.324
XU36-7-28	-1.395
XU36-7-29	-1.159
XU36-7-30	-1.151
XU36-7-31	-0.538
XU36-7-33	-1.158
XU36-7-34	-1.01
XU36-7-37	-1.315
XU36-7-39	-1.161
XU36-7-40	-1.28
XU36-7-41	-1.339
XU36-7-42	-1.244
XU36-7-44	-1.198
XU36-7-45	-1.321
XU36-7-46	-1.24
XU36-7-47	-1.112
Xu36-7-49	-1.207
Xu36-7-50	-1.128
Xu36-7-51	-1.047
Xu36-7-52	-0.97
XU36-7-53	-1.125
XU36-7-54	-1.28
XU36-7-55	-1.264
XU36-7-57	-1.506
XU36-7-58	-1.59
Con-36-8-1	-1.036
Con-36-8-2	-0.739
Con-36-8-3	-0.657
Con-36-8-4	-0.976
Con-36-8-5	-0.934
Con-36-8-6	-0.93
Con-36-8-7	-1.112
XU36-8-15	-1.114
XU36-8-16	-1.12
XU36-8-17	-1.005
XU36-8-18	-1.141
XU36-8-19	-1.259
XU36-8-20	-1.15
XU36-8-21	-1.382
XU36-8-22	-1.301
XU36-8-24	-1.289
XU36-8-26	-1.343
XU36-8-27	-1.345
XU36-8-29	-1.389
XU36-8-30	-1.25
XU36-8-33	-1.359
XU36-8-34	-1.139
XU36-8-35	-1.33
XU36-8-36	-1.373
XU36-8-37	-1.14
XU36-8-38	-1.289
XU36-8-39	-1.344
XU36-8-40	-1.234
XU36-8-41	-1.136
XU36-8-42	-1.089
XU36-8-43	-0.809
XU36-8-44	-0.983
XU36-8-45	-0.931
XU36-8-46	-1.185
XU36-8-47	-1.128
XU36-8-48	-1.105
XU36-8-49	-0.926
XU36-8-50	-0.946
XU36-8-53	-0.915
XU36-8-54	-0.94
XU36-8-55	-0.975
XU36-8-56	-0.962
XU36-8-58	-1.033
XU36-8-59	-1.03
Con_36_9_1	-1.636
Con_36_9_2	-1.339
Con_36_9_3	-1.315
Con_36_9_4	-1.277
Con_36_9_5	-1.069
Con_36_9_6	-1.418
Con_36_9_7	-1.385
Con_36_9_8	-1.376
Con_36_9_9	-1.173
Con_36_9_10	-1.07
Con_36_9_11	-1.236
Con_36_9_12	-1.102
Con_36_9_13	-1.03
Con_36_9_14	-0.798
Con_36_9_15	-1.073
Con_36_9_16	-0.967
Con_36_9_17	-0.568
Con_36_9_18	-1.224
Con_36_9_19	-1.109
Con_36_9_20	-0.978
Con_36_9_21	-0.86
Con_36_9_23	-1.002
Con_36_9_24	-1.052
Con_36_9_25	-0.759
Con_36_9_26	-1.111
Con_36_9_27	-1.193
Con_36_9_28	-1.016
XU36_11_2-3	-1.24
XU36_11_5	-1.28
XU36_11_6
xu36-11-7	-1.3
xu36-11-8	-1.26
xu36-11-9	-1.23
XU36-11-10	-1.066
xu36-11-11	-1.28
XU36-11-12	-0.919
xu36-11-13	-1.42
XU36-11-14	-1.05
XU36-11-15	-0.949
XU36-11-16	-1.151
XU36-11-17	-1.1
XU36-11-18	-1.13
xu36-11-19	-1.18
xu36-11-20
xu36-11-21
xu36-11-22
xu36-11-23
xu36-11-24
xu36-11-25
XU36-11-26	-1.131
XU36-11-27	-1.131
XU36-11-28	-1.189
XU36-11-29	-0.719
XU36-11-30	-0.966
XU36-11-31
XU36-11-32	-1.11
XU36-11-33	-1.005
XU36-11-34	-0.892
XU36-11-35
XU36-11-36
XU36-11-37	-1.075
XU36-11-38	-0.927
XU36-11-39
XU36-11-40	-0.996
XU36-11-41	-0.951
XU36-11-42
XU36-11-43	-0.89
XU36-11-44
XU36-11-45	-0.37
XU36-12-1	-1.822
XU36-12-2	-1.906
XU36-12-3	-2.068
XU36-12-4	-2.049
XU36-12-5	-2.21
XU36-12-6	-2.154
XU36-12-7	-2.222
XU36-12-8	-2.166
XU36-12-9	-2.158
XU36-12-10	-1.894
XU36-12-11	-2.174
XU36-12-12	-2.471
XU36-12-13	-2.164
XU36-12-14	-2.394
XU36-12-15	-1.76
XU36-12-16	-2.306
XU36-12-17	-1.998
XU36-12-18	-2.41
XU36-12-19	-2.271
XU36-12-20	-2.486
XU36-12-21	-2.437
XU36-12-22	-2.567
XU36-12-23	-2.499
XU36-12-24	-2.569
XU36-12-25	-2.496
XU36-12-26	-2.781
XU36-12-27	-2.523
XU36-12-28	-2.487
XU36-12-29	-2.597
XU36-12-30	-2.384
XU36-12-31	-2.5
XU36-12-32	-2.375
XU36-12-33	-2.441
XU36-12-34	-2.498
XU36-12-35	-2.51
Con_36_14_1	-0.824
Con_36_14_2	-0.833
Con_36_14_3	-0.933
Con_36_14_4	-0.973
Con_36_14_5	-0.829
Con_36_14_6	-0.813
Con_36_14_7	-0.779
Con_36_14_8	-1.031
Con_36_14_9	-1.224
Con_36_14_10	-1.113
Con_36_14_11	-1.22
Con_36_14_12	-1.391
Con_36_14_13	-1.357
Con_36_14_14	-1.196
Con_36_14_15	-1.471
Con_36_14_16	-1.315
Con_36_14_17	-1.112
Con_36_14_18	-1.433
Con_36_14_19	-1.155
Con_36_14_20	-1.094
Con_36_14_21	-1.171
Con_36_14_22	-1.061
Con_36_14_23	-1.037
Con_36_14_24	-1.188
Con_36_14_25	-1.274
Con_36_14_26	-1.089
Con_36_14_27	-1.019
Con_36_14_28	-1.08
Con_36_14_29	-0.922
Con_36_14_30	-0.853
Con_36_14_31	-1.74
Con_36_14_32	-1.445
Con_36_14_33	-1.531
Con_36_14_34	-1.225
Con_36_14_35	-1.155
Con_36_14_36	-0.95
Con_36_14_37
Con_36_14_38	-0.886
Con_36_14_39
Con_36_14_40
Con_36_14_41	-0.852
Con_36_14_42	-0.88
Con_36_14_43	-0.8
Con_36_14_44	-0.697
Con_36_14_45	-0.976
Con_36_14_46	-0.984
Con_36_14_47	-1.19
Con_36_14_48	-0.807
Con_36_14_49	-1.188
Con_36_14_50	-0.878
Con_36_14_51
Con_36_14_52
Con_36_14_53
Con_36_14_54	-1.21
Con_36_14_55	-0.85
